# Supplementary material
Source: PubMed Central journal article supplement (PMC5094658)
Supplement: NIHMS822140-supplement-ESI.pdf [file NIHMS822140-supplement-ESI.pdf]

## Electronic Supplementary Information

### **A racemate rules effect supramolecular polymer for ee determination of malic acids in the high ee region**

Xuan-Xuan Chen,<sup>a,b</sup> Yun-Bao Jiang<sup>b\*</sup> and Eric V. Anslyn<sup>a\*</sup>

<sup>a</sup>Department of Chemistry, University of Texas at Austin, Austin, TX 78712, USA

<sup>b</sup>Department of Chemistry, College of Chemistry and Chemical Engineering, MOE Key Laboratory of Spectrochemical Analysis and Instrumentation, and Collaborative Innovation Center of Chemistry for Energy Materials (*iChEM*), Xiamen University, Xiamen 361005, China.

E-mail: anslyn@austin.utexas.edu; ybjiang@xmu.edu.cn

#### **1. General**

All commercial reagents and solvents were used as received.

<sup>1</sup>H NMR spectra were recorded on a Varian MR400 NMR spectrometer and <sup>13</sup>C NMR spectra were recorded on an Agilent MR400 NMR spectrometer.

High-resolution mass spectra (HRMS) were taken on an Agilent 6530 HR ESI mass spectrometer.

Circular dichroism (CD) spectra were recorded on a Jasco J-815 CD spectropolarimeter, using a 1 cm quartz cuvette.

## 2. Molecular models of host-guest complexes

The dimeric PBI aggregates of **1** binding to Mal and **2** binding to Tar were modeled using molecular mechanics with the MMFFaq force field in Spartan 14'. To simplify the modeling, the substituent on one of the imide nitrogens of the PBI host was replaced with a methyl group.

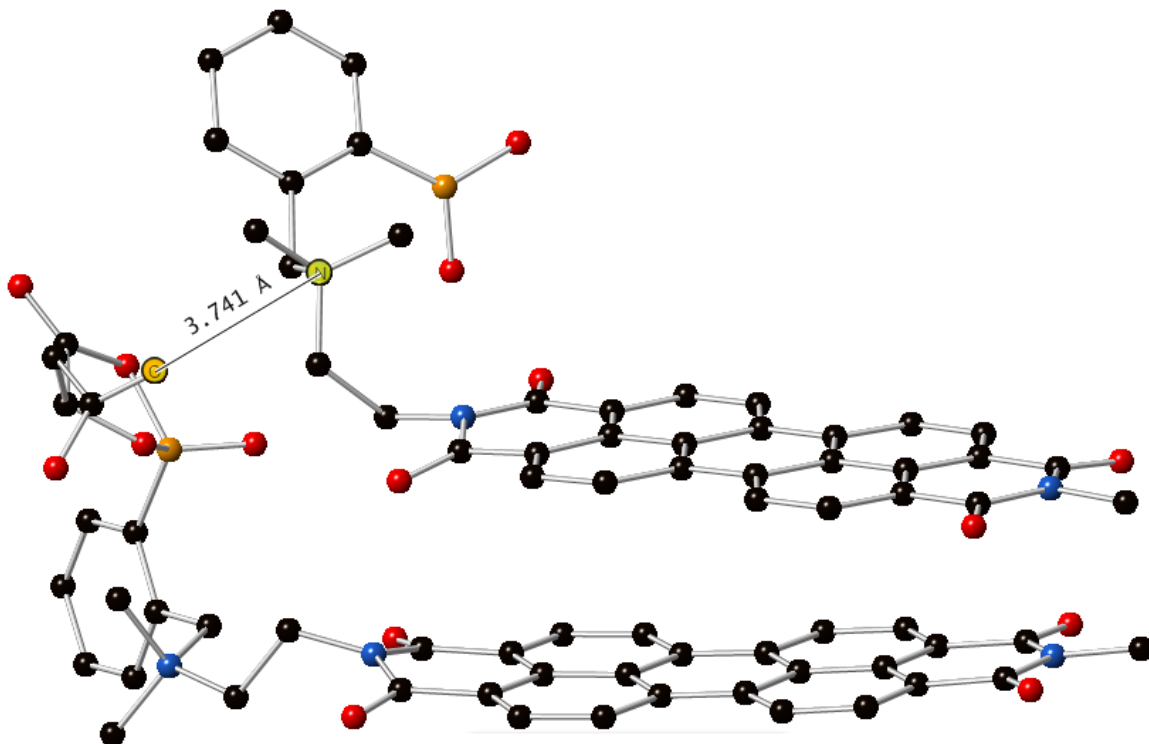

**Fig. S1** Optimized structure of dimeric aggregate of **1** (with one of the imide substituents replaced by a methyl group) binding to L-Mal via a boronate ester linkage and a salt bridge (between a carboxylate group of Mal and a quaternary ammonium group of **1**, with an O...N distance of 3.7 Å as shown in the figure). Hydrogen atoms are omitted for clarity. The aggregate has a  $\pi$ - $\pi$  distance of 3.8 Å. Atom colours: black, C; blue, N; red, O; and orange, B.

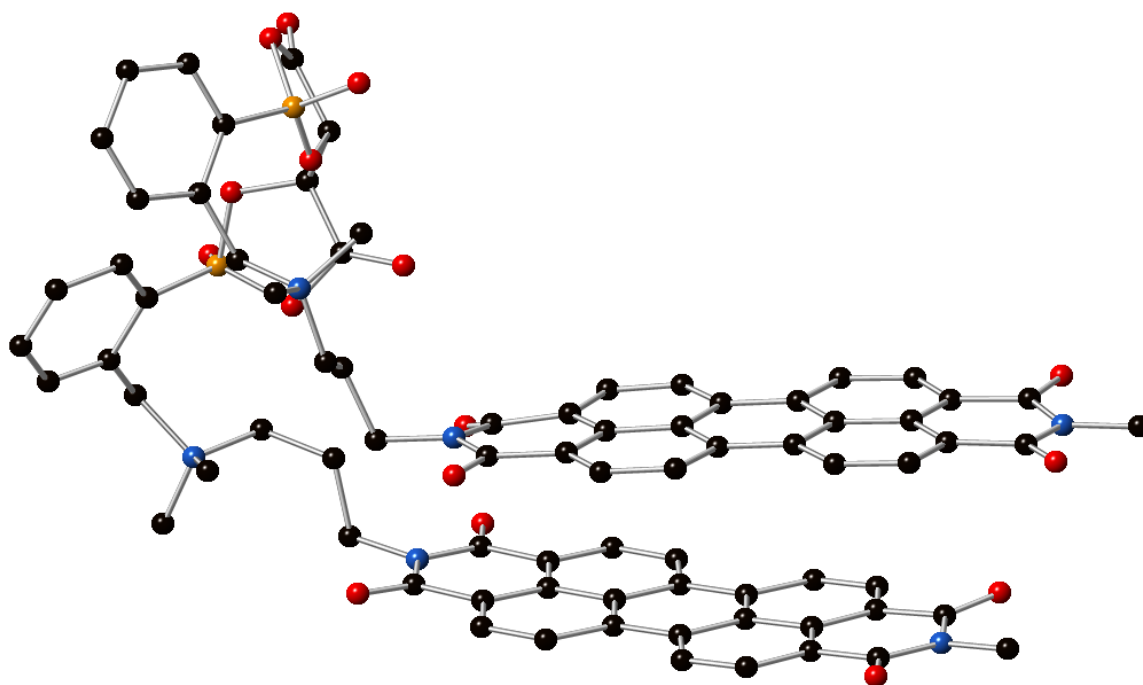

**Fig. S2** Optimized structure of dimeric aggregate of **2** (with one of the imide substituents replaced by a methyl group) binding to L-Tar via two boronate ester linkages. Hydrogen atoms are omitted for clarity. The aggregate has a  $\pi$ - $\pi$  distance of 3.8 Å. Atom colours: black, C; blue, N; red, O; and orange, B.

### 3. Experimental

#### 3.1 Syntheses of Sensor 2

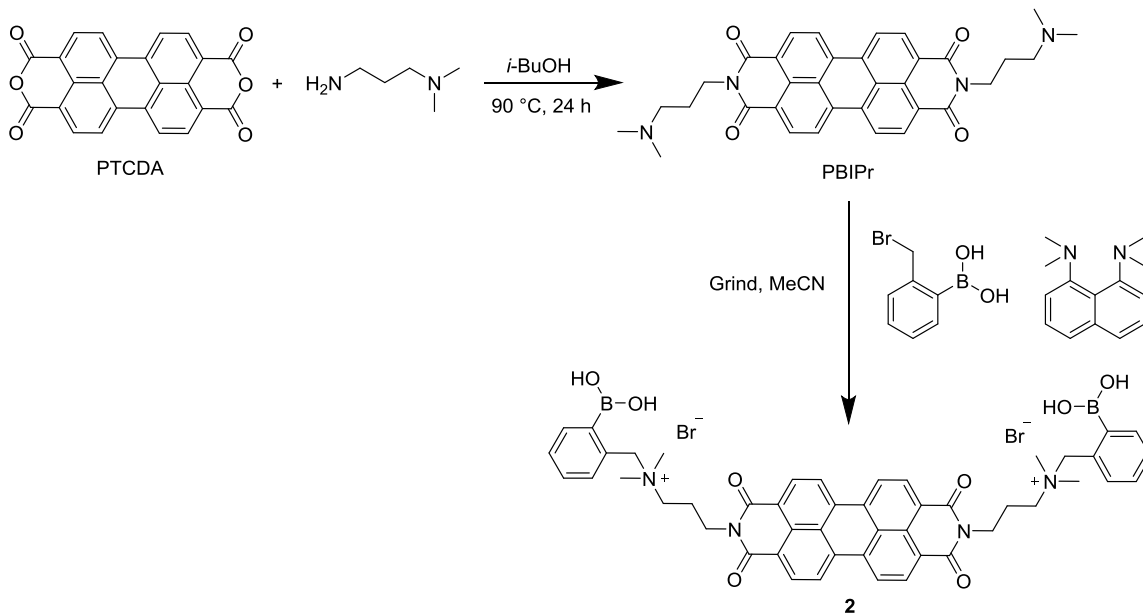

#### Synthesis of PBIPr

PBIPr was synthesized according to a reported procedure<sup>1</sup>.

#### Synthesis of 2

**PBIPr** (0.112 g, 0.2 mmol), 2-bromomethylphenylboronic acid (0.108 g, 0.5 mmol), and 1,8-bis(dimethylamino)naphthalene (0.02 g, 0.1 mmol) was mixed and subject to grinding for 30 min, during which process several drops of MeCN was added to assist mixing. To the mixture was added 2-bromomethylphenylboronic acid (0.108 g, 0.5 mmol) and 1,8-bis(dimethylamino)naphthalene (0.02 g, 0.1 mmol) again, and the mixture was subject to further grinding for 30 min with several drops of MeCN. The resultant mixture was dissolved in hot methanol and the product was precipitated by adding Et<sub>2</sub>O after cooling. The red product **2** was collected and dried under vacuum (0.17 g, 86%). <sup>1</sup>H NMR (400 MHz, TFA) 10.98 (d, J = 7.3 Hz, 4H), 10.92 (d, J = 7.1 Hz, 4H), 9.98 (s, 2H), 9.62 (d, J = 39.6 Hz, 6H), 7.02 (s, 4H), 6.53 (s, 4H), 5.75 (s, 4H), 5.16 (s, 12H), 4.59 (s, 4H).

HRMS(ESI-TOF) *m/z*: [M + 2CH<sub>3</sub>OH - 2H<sub>2</sub>O]<sup>2+</sup> Calcd for C<sub>50</sub>H<sub>52</sub>B<sub>2</sub>N<sub>4</sub>O<sub>8</sub> 429.1980; Found 429.2005.

Because of aggregation of **2** at high concentrations, <sup>13</sup>C NMR could not be obtained.

### 3.2 Sample preparation

The  $\alpha$ -hydroxy carboxylate solutions with different ee were prepared by adding stock solutions of each enantiomer to the buffer (pH 5.0 50 mM acetate buffer). To 1.98 mL of the  $\alpha$ -hydroxy carboxylate solutions was added 20  $\mu$ L of 2.0 mM DMSO stock solution of **1** or **2**. The resultant host-guest solutions were immediately subject to CD measurements.

#### Determination of “unknown” ee

For each system, two five-point calibration curves were prepared for ee determination from 90% to 100% and from -90% to -100%, respectively. The “unknown” ee values were calculated using the calibration equations obtained from linear fit of the calibration curves.

**Table S1 CD intensity of host-guest systems with "unknown" guest ee at the indicated wavelength. [Host] = 50  $\mu$ M.**

| Host / guest, wavelength            | CD intensity with different guest ee |       |       |       |       |       |
|-------------------------------------|--------------------------------------|-------|-------|-------|-------|-------|
|                                     | 92%                                  | 96%   | 98%   | -94%  | -96%  | -98%  |
| <b>1</b> / Mal (0.3 mM), 487 nm     | -53.6                                | -59.0 | -60.7 | 57.4  | 60.0  | 62.5  |
| <b>1</b> / Lac (50 mM), 476 nm      | -58.3                                | -58.4 | -59.2 | 59.0  | 60.9  | 61.2  |
| <b>2</b> / Tar (30 $\mu$ M), 487 nm | 87.5                                 | 90.6  | 88.3  | -83.9 | -85.8 | -85.9 |

### 3.3 CD spectra of **1**/Lac, **2**/Tar and **1**/Mal complexes with different guest ee

#### 3.3.1 **1**/Lac

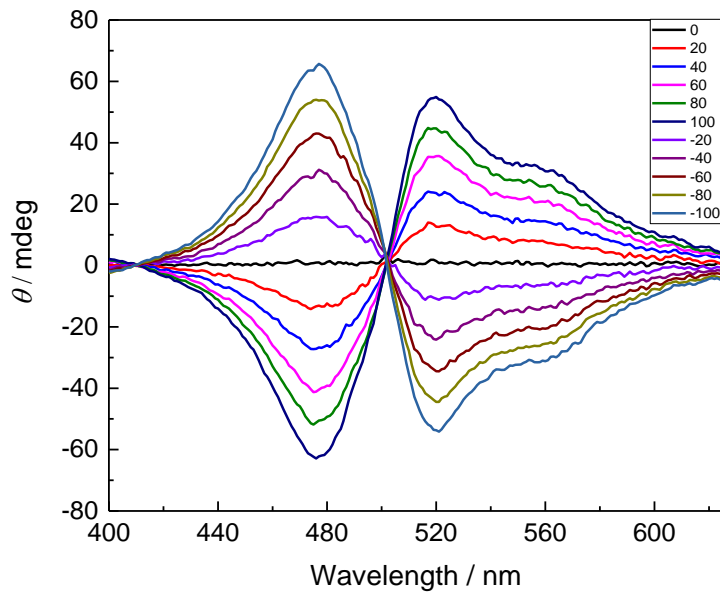

**Fig. S3** CD spectra of the **1**/Lac complex with different ee of Lac in pH 5.0 acetate buffer. [**1**] = 50  $\mu$ M, [L-Lac] + [D-Lac] = 50 mM.

#### 3.3.2 **2**/Tar

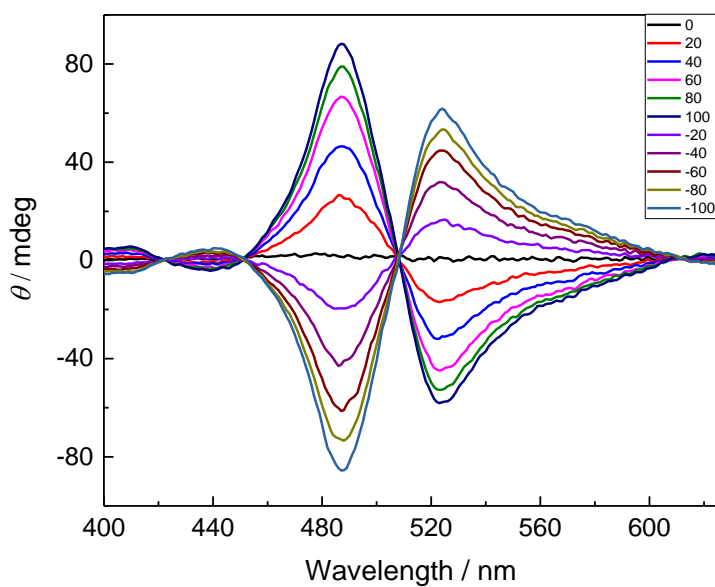

**Fig. S4** CD spectra of the **1**/Tar complex with different ee of Tar in pH 5.0 acetate buffer. [**1**] = 50  $\mu$ M, [L-Tar] + [D-Tar] = 30  $\mu$ M.

### 3.3.3 1/Mal

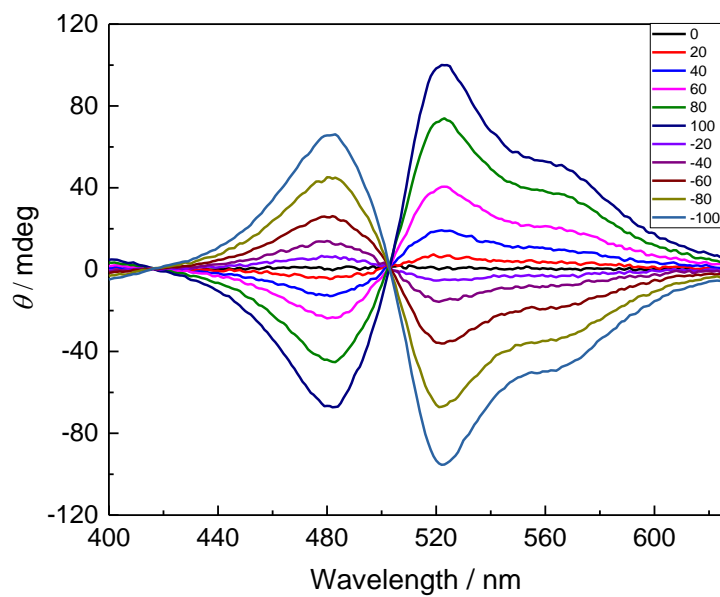

**Fig. S5** CD spectra of the **1**/Mal complex with different ee of Mal in pH 5.0 acetate buffer. [**1**] = 50  $\mu\text{M}$ , [L-Mal] + [D-Mal] = 0.3 mM.

### 3.4 Calibration curves for ee determination

#### 3.4.1 1/Mal (RRE)

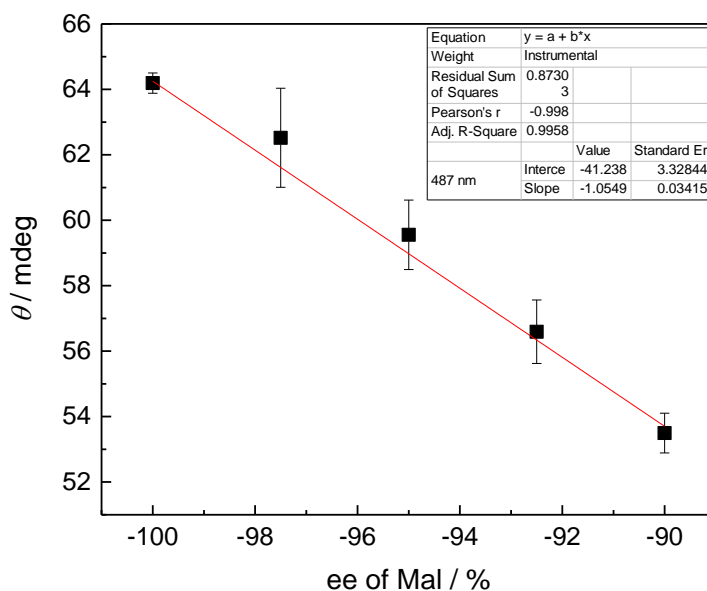

**Fig. S6** Calibration curve for ee determination (-90% – -100%) of Mal using CD intensity of the 1/Mal complex at 487 nm. [1] = 50  $\mu$ M, [L-Mal] + [D-Mal] = 0.3 mM. Error bars represent standard deviations from three repeats.

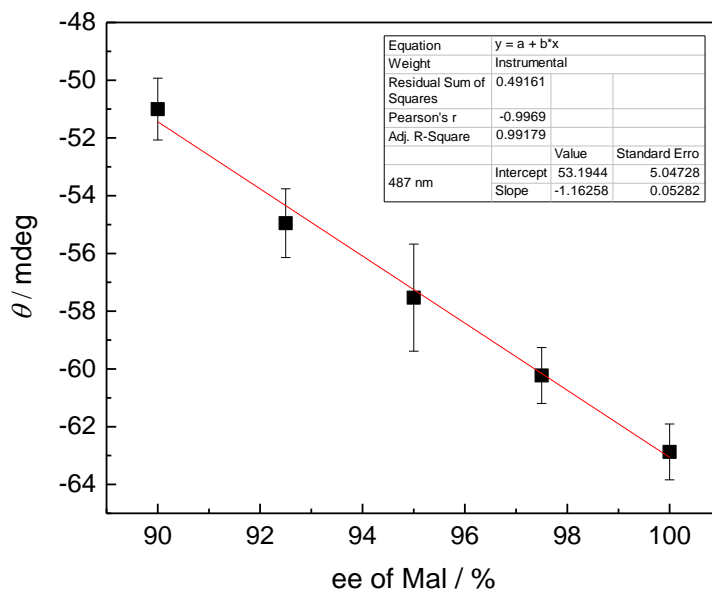

**Fig. S7** Calibration curve for ee determination (90% – 100%) of Mal using CD intensity of the 1/Mal complex at 487 nm. [1] = 50  $\mu$ M, [L-Mal] + [D-Mal] = 0.3 mM. Error bars represent standard deviations from three repeats.



### 3.4.2 1/Lac (Linear)

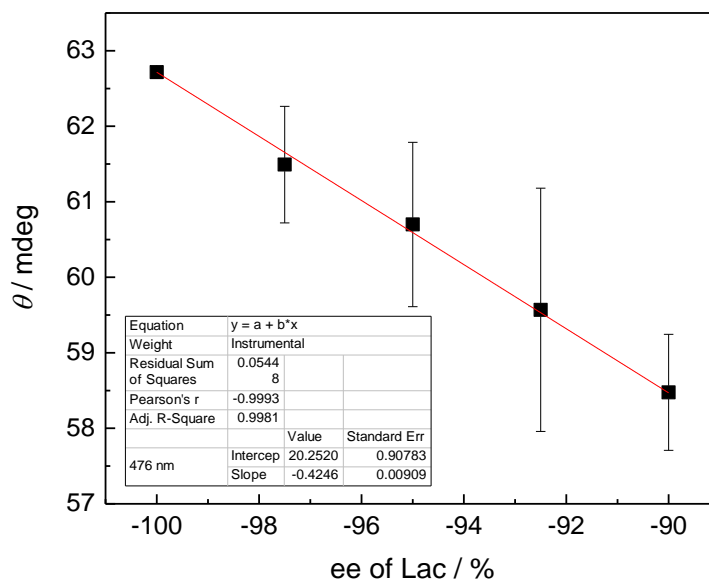

**Fig. S8** Calibration curve for ee determination (-90% – -100%) of Lac using CD intensity of the 1/Lac complex at 476 nm. [1] = 50  $\mu$ M, [L-Lac] + [D-Lac] = 50 mM. Error bars represent standard deviations from three repeats.

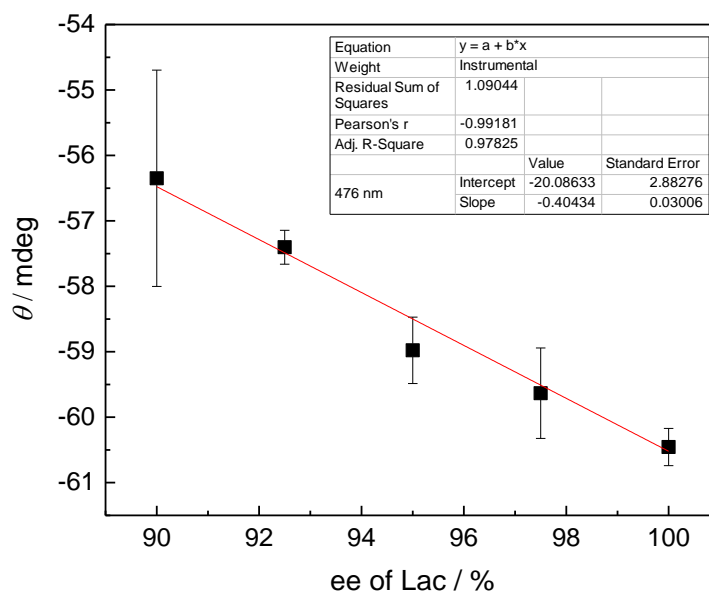

**Fig. S9** Calibration curve for ee determination (90% – 100%) of Lac using CD intensity of the 1/Lac complex at 476 nm. [1] = 50  $\mu$ M, [L-Lac] + [D-Lac] = 50 mM. Error bars represent standard deviations from three repeats.

### 3.4.3 2/Tar (MRE)

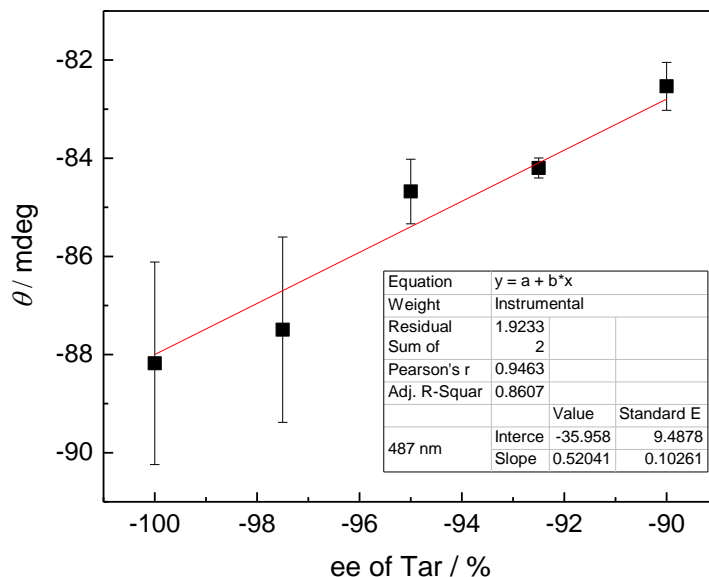

**Fig. S10** Calibration curve for ee determination (-90% – -100%) of Tar using CD intensity of the 2/Tar complex at 487 nm. [2] = 50  $\mu$ M, [L-Tar] + [D-Tar] = 30  $\mu$ M. Error bars represent standard deviations from three repeats.

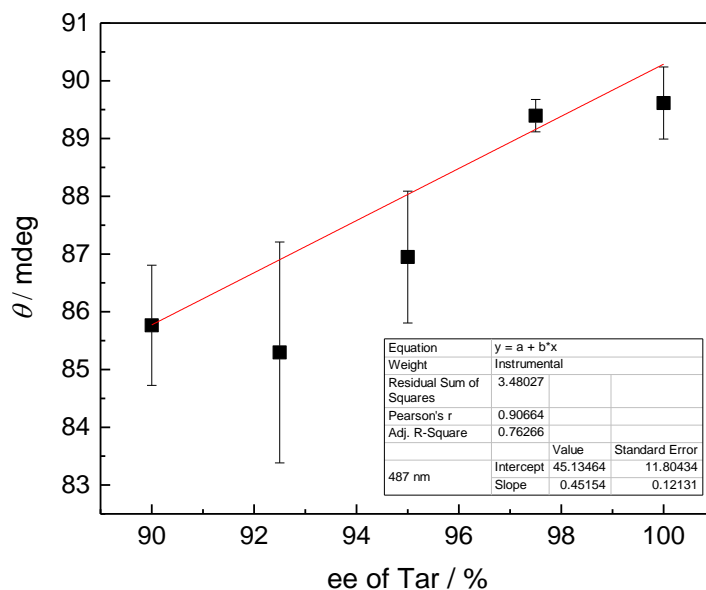

**Fig. S11** Calibration curve for ee determination (90% – 100%) of Tar using CD intensity of the 2/Tar complex at 487 nm. [2] = 50  $\mu$ M, [L-Tar] + [D-Tar] = 30  $\mu$ M. Error bars represent standard deviations from three repeats.

### 3.5 CD-ee titrations for the 1/Mal complex under different conditions

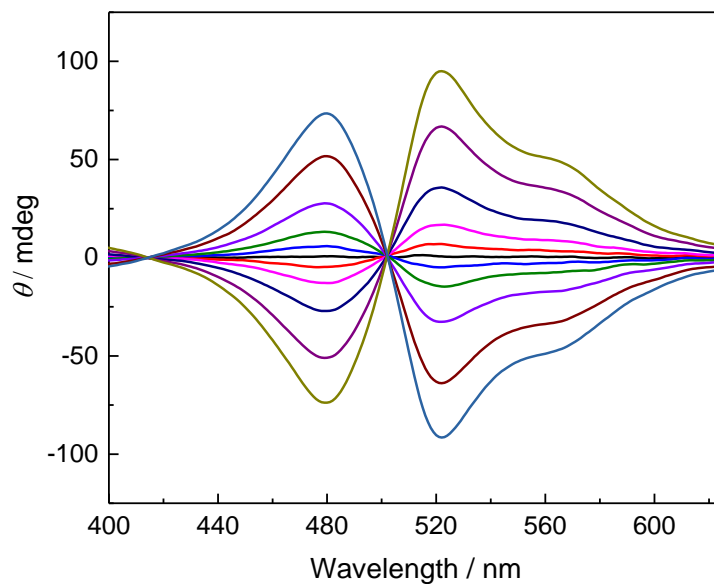

**Fig. S12** CD spectra of the **1**/Mal complex with different ee of Mal in pH 5.5 50 mM MES buffer.  $[1] = 50 \mu\text{M}$ ,  $[\text{L-Mal}] + [\text{D-Mal}] = 0.3 \text{ mM}$ .

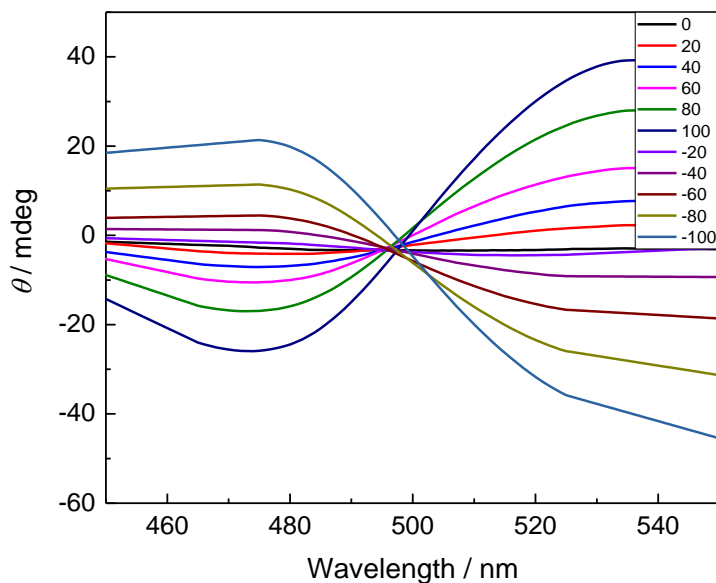

**Fig. S13** CD spectra of the **1**/Mal complex with different ee of Mal in pH 5.0 acetate buffer containing 20% (v/v) MeOH.  $[1] = 50 \mu\text{M}$ ,  $[\text{L-Mal}] + [\text{D-Mal}] = 0.3 \text{ mM}$ .

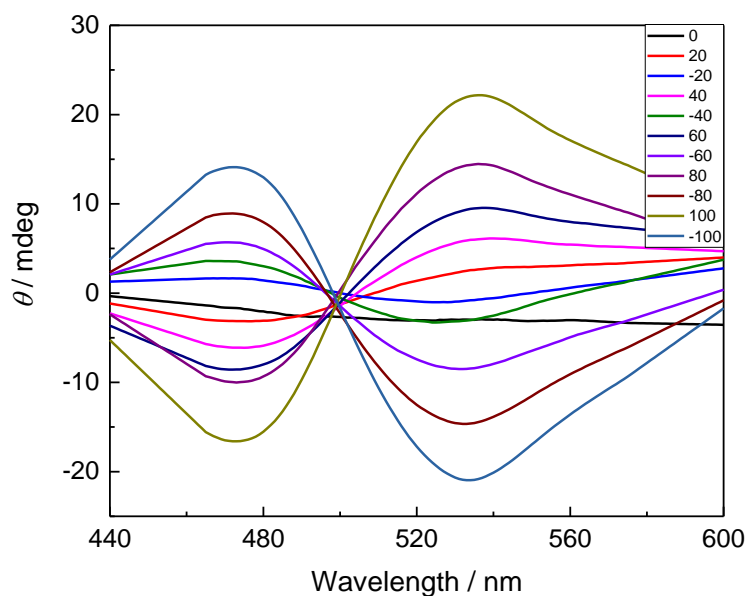

**Fig. S14** CD spectra of the **1**/Mal complex with different ee of Mal in pH 5.0 acetate buffer in the presence of 1 M TMAO. [**1**] = 50  $\mu$ M, [L-Mal] + [D-Mal] = 0.3 mM.

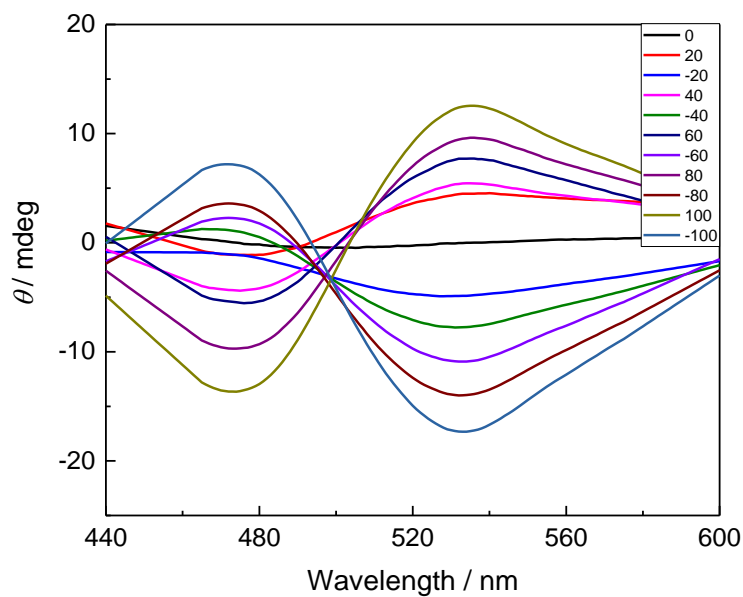

**Fig. S15** CD spectra of the **1**/Mal complex with different ee of Mal in pH 5.0 acetate buffer in the presence of 1 M  $\beta$ -Ala. [**1**] = 50  $\mu$ M, [L-Mal] + [D-Mal] = 0.3 mM.

## Reference

1. J. Zhou, G. Yuan, J. Liu, C. G. Zhan, *Chem. Eur. J.*, 2007, **13**, 945-949.
